# Supplementary material for: Antimicrobial Resistance Genes in Respiratory Bacteria from Weaned Dairy Heifers
Source: MDPI journal article supplement (doi:10.3390/pathogens13040300), 2024-04-03
Supplement: s1 [file s1]

## Supplementary 2

**Table: Standard drug classes used for AMR gene classification**

| Standardized Drug Class Categories | Sub-Classes                                                   | AMR Genes Present                                                             | Drugs tested with clinically applicable breakpoints                                                    | Drugs tested without clinically applicable breakpoints |
|------------------------------------|---------------------------------------------------------------|-------------------------------------------------------------------------------|--------------------------------------------------------------------------------------------------------|--------------------------------------------------------|
| Aminoglycoside                     |                                                               | AAC(3)-IV, aadA25, ANT(2'')-Ia, APH(3')-Ia, APH(3'')-Ib, APH(4)-Ia, APH(6)-Id | Gentamicin, Spectinomycin                                                                              | Neomycin                                               |
| Beta-Lactam                        | Cephalosporin( <b>C</b> ), Penicillin( <b>P</b> )             | PBP3_mut, OXA-2, OXA-192, ROB-1, ROB-2, ROB-5, ROB-7                          | Ceftiofur( <b>C</b> ), Penicillin( <b>P</b> )                                                          | Ampicillin( <b>P</b> )                                 |
| Macrolide+                         | Macrolide( <b>M</b> ), Lincosamide( <b>L</b> ), Streptogramin | Erm(42), ErmF, mphE( <b>Macrolide only</b> ), msrE                            | Gamithromycin( <b>M</b> ), Tildipirosin( <b>M</b> ), Tilmicosin( <b>M</b> ), Tulathromycin( <b>M</b> ) | Clindamycin( <b>L</b> ), Tylosin( <b>M</b> )           |
| Phenicol                           |                                                               | CAT, floR, pp-flo                                                             | Florfenicol                                                                                            |                                                        |
| Sulfonamide                        |                                                               | sul2                                                                          |                                                                                                        | Sulphadimethoxine, Trimethoprin-sulfameth              |
| Tetracycline                       |                                                               | tet(D), tet(H)                                                                | Tetracycline                                                                                           |                                                        |
| Fluoroquinolone                    |                                                               |                                                                               | Danofloxacin, Enrofloxacin                                                                             |                                                        |
| Pleuromutilin                      |                                                               |                                                                               |                                                                                                        | Tiamulin                                               |
| Diaminopyrimidine                  |                                                               | dfrA14                                                                        |                                                                                                        |                                                        |
| Elfamycin                          |                                                               | EF-Tu_mut                                                                     |                                                                                                        |                                                        |
