# Supplementary material for: Antimicrobial Resistance Genes in Respiratory Bacteria from Weaned Dairy Heifers
Source: MDPI journal article supplement (doi:10.3390/pathogens13040300), 2024-04-03
Supplement: s1 [file s1]

## Supplementary 5

**MALDI-TOF bacterial isolate identification (ID) compared to genomic ID from WGS.** Six out of 130 *P. multocida* cultures were identified as pure *P. multocida* by MALDI-TOF, however genomic ID using WGS demonstrated evidence of contamination. The isolate ID provided by MALDI-TOF is highlighted in blue.

| Organism                               | 1   | 2   | 3  | 4  | 5  | 6  |
|----------------------------------------|-----|-----|----|----|----|----|
| <b>CheckM Predicted %Contamination</b> | 101 | 100 | 84 | 58 | 44 | 18 |
| <i>P. multocida</i>                    | 79  | 90  | 94 | 95 | 95 | 2  |
| <i>M. haemolytica</i>                  | 20  | 0   | 5  | 0  | 5  | 0  |
| <i>H. somni</i>                        | 0   | 0   | 0  | 0  | 0  | 97 |
| <i>Moraxella bovoculi</i>              | 0   | 10  | 0  | 5  | 0  | 0  |
